# Supplementary material for: Natural fish oil improves the differentiation and maturation of oligodendrocyte precursor cells to oligodendrocytes in vitro after interaction with the blood–brain barrier
Source: Front Immunol. 2022 Jul 22;13:932383. doi: 10.3389/fimmu.2022.932383 (PMC9353075; doi:10.3389/fimmu.2022.932383)
Supplement: Supplementary Table 2 — The lipid species identified in FOM and BO using RP-LC-Q-Orbitrap HRMS analysis. Data are presented as the percentage of lipids from two independent samples. [file Table_2.xlsx]

## Sheet: Tabel
		abbreviations: CE- Cholesteryl ester; Cer - Ceramide; MG - Monoacylglycerol; DG - Diacylglycerol; DG-O - Alkyl-acylglycerol; TG - Triacylglycerol; oxFA - oxidized Fatty Acid
			FOM (fish oil mixture)			BO (borage oil)
		Title	Percentage of the total area [%]	Main components		Title	Percentage of the total area [%]	Main components
		CE 30:5	0.00985819	∑ DG [%]	5.28072	Cer 44:6;2O|Cer 12:2;2O/32:4	0.0149638	∑ DG [%]	6.29058
		DG 30:1	0.00550816	DAG [n]	78	Cer 44:6;2O|Cer 12:2;2O/32:4	0.0135809	DAG [n]	47
		DG 32:0|DG 16:0_16:0	0.00514986	∑ MG [%]	0.0450156	DG 32:0	0.0128964	∑ MG [%]	0
		DG 32:1	0.0121926	MG [n]	6	DG 32:0|DG 16:0_16:0	0.00603181	MG [n]	0
		DG 32:1|DG 16:0_16:1	0.0345542	∑ TG [%)	94.6644	DG 33:4	0.00135698	∑ TG [%)	93.6809
		DG 32:3	0.0198096	TG [n]	232	DG 34:0|DG 16:0_18:0	0.00453087	TG [n]	151
		DG 33:1	0.0126467			DG 34:1	0.00406485
		DG 33:1|DG 16:0_17:1	0.0106063			DG 34:1	0.0245282
		DG 33:2|DG 16:1_17:1	0.00281889			DG 34:1	0.0122198
		DG 33:2|DG 16:1_17:1	0.00686386			DG 34:1|DG 16:0_18:1	0.0800148
		DG 34:1	0.0821245			DG 34:2	0.00595217
		DG 34:1	0.0673398			DG 34:2	0.00414704
		DG 34:1|DG 16:0_18:1	0.250991			DG 34:2	0.144827
		DG 34:2	0.0507987			DG 34:2|DG 16:0_18:2	0.40997
		DG 34:2	0.0217671			DG 34:3	0.0230878
		DG 34:2	0.0584712			DG 34:3	0.0290898
		DG 34:2|DG 16:1_18:1	0.0725596			DG 34:3|DG 16:0_18:3	0.235421
		DG 34:3	0.00355305			DG 36:1	0.0104297
		DG 34:5	0.00191964			DG 36:1	0.00809727
		DG 34:5|DG 14:0_20:5	0.00881698			DG 36:1|DG 18:0_18:1	0.0379963
		DG 35:1	0.00436042			DG 36:2	0.0576248
		DG 35:1|DG 17:0_18:1	0.00583126			DG 36:2	0.0711106
		DG 35:2	0.0266923			DG 36:2|DG 18:0_18:2	0.31659
		DG 35:2|DG 17:1_18:1	0.0193571			DG 36:3	0.087663
		DG 36:1	0.0391877			DG 36:3|DG 18:1_18:2	0.683606
		DG 36:1|DG 16:0_20:1	0.124939			DG 36:4	0.144318
		DG 36:2	0.0741141			DG 36:4	0.288706
		DG 36:2|DG 18:1_18:1	0.426253			DG 36:4|DG 18:2_18:2	1.75843
		DG 36:3	0.0182162			DG 36:5	0.201527
		DG 36:3|DG 18:1_18:2	0.039565			DG 36:5|DG 18:2_18:3	1.11762
		DG 36:4	0.00431988			DG 36:6|DG 18:3_18:3	0.109596
		DG 36:5	0.00329938			DG 36:6|DG 18:3_18:3	0.117797
		DG 36:5	0.040589			DG 36:7	0.00283326
		DG 36:5|DG 16:0_20:5	0.0216108			DG 36:7|DG 18:3_18:4	0.00860491
		DG 36:5|DG 16:0_20:5	0.0223544			DG 36:7|DG 18:3_18:4	0.00791106
		DG 36:6	0.00769156			DG 38:2|DG 20:0_18:2	0.0216303
		DG 36:6|DG 16:1_20:5	0.00941646			DG 38:2|DG 20:0_18:2	0.0207738
		DG 37:2	0.00589576			DG 38:3	0.0119754
		DG 37:2|DG 18:1_19:1	0.0154261			DG 38:3|DG 20:1_18:2	0.0811252
		DG 38:1	0.0291879			DG 38:4	0.0103755
		DG 38:1|DG 16:0_22:1	0.0292832			DG 38:4|DG 18:2_20:2	0.0524264
		DG 38:1|DG 16:0_22:1	0.0427245			DG 39:10	0.00212939
		DG 38:2	0.0324546			DG 40:2	0.0128783
		DG 38:2|DG 16:1_22:1	0.0108836			DG 40:2|DG 18:1_22:1	0.00549395
		DG 38:2|DG 18:1_20:1	0.110455			DG 40:3	0.00777057
		DG 38:3|DG 18:1_20:2	0.00916899			DG 40:3|DG 22:1_18:2	0.0138573
		DG 38:5	0.00819144			DG 42:3|DG 24:1_18:2	0.00778027
		DG 38:5|DG 18:1_20:4	0.0189307			DG 42:4|DG 24:1_18:3	0.00291191
		DG 38:6	0.0330854			DG 45:6	0.00520083
		DG 38:6|DG 16:0_22:6	0.0217183			DG O-39:2|DG O-23:1_16:1	0.00564527
		DG 38:6|DG 18:1_20:5	0.0216952			TG 26:0|TG 8:0_8:0_10:0	0.00562079
		DG 38:7	0.00753423			TG 28:0|TG 8:0_10:0_10:0	0.0016282
		DG 40:10|DG 20:5_20:5	0.00573768			TG 30:0|TG 8:0_10:0_12:0	0.00175322
		DG 40:10|DG 20:5_20:5	0.00313655			TG 34:0|TG 8:0_12:0_14:0	0.017015
		DG 40:2	0.0358383			TG 34:0|TG 8:0_12:0_14:0	0.00241405
		DG 40:2|DG 18:1_22:1	0.19783			TG 36:0|TG 8:0_10:0_18:0	0.0301463
		DG 40:3|DG 22:1_18:2	0.0042687			TG 36:0|TG 8:0_12:0_16:0	0.00327826
		DG 40:5|DG 18:1_22:4	0.0050023			TG 36:0|TG 8:0_12:0_16:0	0.032315
		DG 40:6	0.00354495			TG 38:0|TG 8:0_12:0_18:0	0.00411863
		DG 40:6|DG 18:1_22:5	0.0179681			TG 40:0|TG 10:0_12:0_18:0	0.00320859
		DG 40:6|DG 18:1_22:5	0.00501458			TG 41:1;1O|TG 10:0_16:0_15:1;1O	0.00701803
		DG 40:7	0.0260405			TG 43:2;1O|TG 10:0_16:0_17:2;1O	0.00135722
		DG 40:7	0.0287979			TG 43:2;2O|TG 16:0_17:2_10:0;2O	0.00353429
		DG 40:7|DG 18:1_22:6	0.0536242			TG 50:1|TG 16:0_16:0_18:1	0.467829
		DG 40:7|DG 18:1_22:6	0.0688803			TG 50:2|TG 16:0_16:0_18:2	0.87877
		DG 42:11	0.00605694			TG 50:3|TG 16:0_16:0_18:3	0.345667
		DG 42:11|DG 20:5_22:6	0.00687299			TG 50:4|TG 16:0_16:1_18:3	0.0874073
		DG 42:2	0.0171539			TG 50:5|TG 14:0_18:2_18:3	0.0622333
		DG 42:2|DG 18:1_24:1	0.113928			TG 50:6|TG 14:0_18:3_18:3	0.0164387
		DG 42:6|DG 20:1_22:5	0.00334377			TG 51:5|TG 15:0_18:2_18:3	0.00763479
		DG 42:6|DG 22:1_20:5	0.00550742			TG 51:5|TG 15:0_18:2_18:3	0.00834662
		DG 42:7|DG 20:1_22:6	0.0125118			TG 52:1|TG 16:0_18:0_18:1	0.687878
		DG 42:7|DG 20:1_22:6	0.0252858			TG 52:2|TG 16:0_18:1_18:1	2.7917
		DG 43:11	0.00570991			TG 52:3;1O|TG 16:0_18:2_18:1;1O	0.0304594
		DG 44:2|DG 22:1_22:1	0.0165761			TG 52:3|TG 16:0_18:1_18:2	0.00657187
		DG 44:7|DG 22:1_22:6	0.0128046			TG 52:3|TG 16:0_18:1_18:2	4.16065
		DG 44:7|DG 22:1_22:6	0.00801086			TG 52:4;1O|TG 16:0_18:2_18:2;1O	0.0270421
		DG 52:2	0.0201942			TG 52:4;1O|TG 16:0_18:2_18:2;1O	0.0921138
		DG 52:6|DG 18:1_34:5	0.0348458			TG 52:4;2O|TG 16:0_18:1_18:3;2O	0.0122325
		DG O-32:0|DG O-16:0_16:0	0.0277211			TG 52:4|TG 16:0_18:2_18:2	0.0154224
		DG O-32:1|DG O-16:1_16:0	0.115868			TG 52:4|TG 16:0_18:2_18:2	6.53874
		DG O-34:0|DG O-18:0_16:0	0.0174817			TG 52:5;1O|TG 16:0_18:2_18:3;1O	0.0319999
		DG O-34:1|DG O-18:1_16:0	0.536056			TG 52:5;1O|TG 16:0_18:2_18:3;1O	0.0732094
		DG O-34:2|DG O-16:1_18:1	0.108283			TG 52:5;2O|TG 16:0_18:2_18:3;2O	0.00364171
		DG O-34:2|DG O-19:1_15:1	0.00974846			TG 52:5|TG 16:0_18:2_18:3	2.92248
		DG O-35:1|DG O-17:0_18:1	0.0259672			TG 52:6;1O|TG 16:0_18:3_18:3;1O	0.0707266
		DG O-35:1|DG O-17:0_18:1	0.026882			TG 52:6|TG 16:0_18:3_18:3	1.19321
		DG O-35:2|DG O-18:1_17:1	0.0898928			TG 52:7;1O|TG 16:0_18:4_18:3;1O	0.00186165
		DG O-36:1|DG O-18:0_18:1	0.199227			TG 52:7|TG 16:0_18:3_18:4	0.122801
		DG O-36:2|DG O-18:1_18:1	0.833975			TG 52:8|TG 16:1_18:3_18:4	0.0037538
		DG O-36:3|DG O-18:2_18:1	0.0298426			TG 53:3|TG 17:0_18:1_18:2	0.0221912
		DG O-36:3|DG O-19:1_17:2	0.0149215			TG 53:4|TG 17:0_18:2_18:2	0.0293598
		DG O-37:2|DG O-19:1_18:1	0.0330683			TG 53:5|TG 17:1_18:2_18:2	0.0307737
		DG O-38:1|DG O-16:0_22:1	0.0818008			TG 53:6|TG 17:1_18:2_18:3	0.0151699
		DG O-38:2|DG O-18:1_20:1	0.278603			TG 53:7|TG 17:2_18:2_18:3	0.0182365
		DG O-42:2|DG O-18:1_24:1	0.0356304			TG 53:8|TG 18:2_17:3_18:3	0.0117193
		DG O-42:2|DG O-18:1_24:1	0.0583421			TG 54:1|TG 16:0_20:0_18:1	0.308904
		MG 36:0	2.92656e-05			TG 54:10;1O|TG 18:3_18:4_18:3;1O	0.00640741
		MG 36:4	0.00277007			TG 54:10|TG 18:3_18:3_18:4	0.0221435
		MG 37:1	0.0107938			TG 54:10|TG 18:3_18:3_18:4	0.337028
		MG 38:3	0.00887873			TG 54:10|TG 18:3_18:3_18:4	0.0243431
		MG 38:3	0.0175287			TG 54:2|TG 18:0_18:1_18:1	0.0220951
		MG 38:6	0.00501501			TG 54:2|TG 18:0_18:1_18:1	2.26833
		TG 24:0|TG 8:0_8:0_8:0	0.00381735			TG 54:2|TG 18:0_18:1_18:1	0.0224437
		TG 24:0|TG 8:0_8:0_8:0	0.00912402			TG 54:3|TG 18:0_18:1_18:2	2.20636
		TG 26:0|TG 8:0_8:0_10:0	0.0150912			TG 54:3|TG 18:0_18:1_18:2	3.08307
		TG 26:0|TG 8:0_8:0_10:0	0.00844419			TG 54:4;1O|TG 18:0_18:2_18:2;1O	0.0111171
		TG 26:0|TG 8:0_8:0_10:0	0.0205668			TG 54:4;1O|TG 18:1_18:1_18:2;1O	0.0871922
		TG 28:0|TG 8:0_10:0_10:0	0.00563475			TG 54:4;2O|TG 18:1_18:1_18:2;2O	0.00750985
		TG 28:0|TG 8:0_10:0_10:0	0.0116074			TG 54:4|TG 18:1_18:1_18:2	7.48324
		TG 38:0|TG 12:0_12:0_14:0	0.00902742			TG 54:5;1O|TG 18:1_18:2_18:2;1O	0.116136
		TG 40:1|TG 10:0_14:0_16:1	0.00977139			TG 54:5;1O|TG 18:1_18:2_18:2;1O	0.0222939
		TG 42:0|TG 12:0_14:0_16:0	0.0167762			TG 54:5;2O|TG 18:1_18:2_18:2;2O	0.0156025
		TG 42:2|TG 12:0_14:1_16:1	0.0141238			TG 54:5;2O|TG 18:1_18:2_18:2;2O	0.00648329
		TG 42:2|TG 14:0_14:1_14:1	0.00865748			TG 54:5|TG 18:0_18:2_18:3	5.83055
		TG 43:2|TG 16:0_13:1_14:1	0.0457108			TG 54:6;1O|TG 18:2_18:2_18:2;1O	0.336619
		TG 44:1|TG 12:0_16:0_16:1	0.0224085			TG 54:6;1O|TG 18:2_18:3_18:1;1O	0.0914752
		TG 44:1|TG 14:0_14:0_16:1	0.07098			TG 54:6;2O|TG 18:1_18:3_18:2;2O	0.0249615
		TG 44:2|TG 14:0_14:1_16:1	0.0270311			TG 54:6;2O|TG 18:2_18:2_18:2;2O	0.0107847
		TG 44:2|TG 14:0_14:1_16:1	0.0245611			TG 54:6;3O|TG 18:2_18:2_18:2;3O	0.00374212
		TG 44:3|TG 14:0_14:0_16:3	0.00660829			TG 54:6|TG 18:1_18:2_18:3	0.0213974
		TG 44:3|TG 14:0_14:0_16:3	0.00472285			TG 54:6|TG 18:2_18:2_18:2	0.0161454
		TG 44:4|TG 14:0_14:0_16:4	0.00927003			TG 54:6|TG 18:2_18:2_18:2	7.15612
		TG 45:1|TG 14:0_15:0_16:1	0.0288213			TG 54:6|TG 18:2_18:2_18:2	0.0226711
		TG 45:2|TG 13:0_14:1_18:1	0.0440688			TG 54:7;1O|TG 18:2_18:2_18:3;1O	0.487141
		TG 45:2|TG 16:0_14:1_15:1	0.0467021			TG 54:7;1O|TG 18:2_18:3_18:2;1O	0.0397149
		TG 45:3|TG 14:0_16:1_15:2	0.0144665			TG 54:7;1O|TG 18:2_18:3_18:2;1O	0.0113062
		TG 46:1|TG 14:0_16:0_16:1	0.577878			TG 54:7;2O|TG 18:2_18:2_18:3;2O	0.0792596
		TG 46:2|TG 14:0_16:1_16:1	0.456063			TG 54:7;2O|TG 18:2_18:3_18:2;2O	0.0092569
		TG 46:3|TG 14:1_16:1_16:1	0.0272998			TG 54:7|TG 18:2_18:2_18:3	0.0330122
		TG 46:4|TG 14:0_16:1_16:3	0.0933751			TG 54:7|TG 18:2_18:2_18:3	7.25281
		TG 46:5|TG 14:0_16:1_16:4	0.0397735			TG 54:8;1O|TG 18:2_18:3_18:3;1O	0.00485166
		TG 47:0;2O|TG 14:0_14:0_19:0;2O	0.00590548			TG 54:8;1O|TG 18:2_18:3_18:3;1O	0.139237
		TG 47:1|TG 13:0_16:0_18:1	0.0430266			TG 54:8;1O|TG 18:2_18:3_18:3;1O	0.198675
		TG 47:1|TG 14:0_15:0_18:1	0.150421			TG 54:8;2O|TG 18:2_18:3_18:3;2O	0.0140294
		TG 47:2|TG 13:0_16:1_18:1	0.150695			TG 54:8;2O|TG 18:2_18:3_18:3;2O	0.0160919
		TG 47:3|TG 13:1_16:1_18:1	0.0403693			TG 54:8;2O|TG 18:2_18:3_18:3;2O	0.00388521
		TG 48:1;3O|TG 16:0_16:0_16:1;3O	0.371016			TG 54:8|TG 18:2_18:3_18:3	0.0641073
		TG 48:1|TG 14:0_16:0_18:1	1.52627			TG 54:8|TG 18:2_18:3_18:3	10.2091
		TG 48:1|TG 14:0_17:0_17:1	0.000379041			TG 54:9;1O|TG 18:3_18:3_18:3;1O	0.0464621
		TG 48:2|TG 14:0_16:1_18:1	1.97258			TG 54:9|TG 18:2_18:3_18:4	2.74476
		TG 48:3|TG 14:1_16:1_18:1	0.755083			TG 55:4;1O|TG 18:1_18:1_19:2;1O	0.000244503
		TG 48:4|TG 14:0_16:0_18:4	0.161363			TG 56:1|TG 16:0_22:0_18:1	0.0807667
		TG 48:5|TG 14:0_14:0_20:5	0.0131544			TG 56:2|TG 16:0_18:1_22:1	0.0246287
		TG 48:5|TG 14:0_14:0_20:5	0.171991			TG 56:2|TG 16:0_18:1_22:1	1.0506
		TG 48:5|TG 14:0_14:0_20:5	0.0110604			TG 56:3|TG 16:0_22:1_18:2	2.58229
		TG 48:6|TG 16:1_16:1_16:4	0.0363815			TG 56:3|TG 18:1_18:1_20:1	0.0319214
		TG 48:6|TG 16:1_16:1_16:4	0.0178068			TG 56:4|TG 18:1_20:1_18:2	1.4904
		TG 48:7|TG 16:0_16:3_16:4	0.00924004			TG 56:4|TG 19:0_19:0_18:4	0.0236269
		TG 49:1|TG 15:0_16:0_18:1	0.306349			TG 56:4|TG 19:0_19:0_18:4	0.0329834
		TG 49:2;2O|TG 16:1_16:1_17:0;2O	0.0241367			TG 56:4|TG 20:0_18:1_18:3	1.68378
		TG 49:2;3O|TG 17:0_16:1_16:1;3O	0.00897959			TG 56:5;1O|TG 20:1_18:2_18:2;1O	0.0117824
		TG 49:2|TG 15:0_16:1_18:1	0.74575			TG 56:5|TG 20:1_18:2_18:2	2.74111
		TG 49:3;1O|TG 16:0_18:1_15:2;1O	0.118744			TG 56:6|TG 20:1_18:2_18:3	1.7611
		TG 49:3;1O|TG 16:0_18:1_15:2;1O	0.0705156			TG 56:7|TG 20:1_18:3_18:3	0.285283
		TG 49:3|TG 16:1_16:1_17:1	0.141905			TG 56:7|TG 9:0_19:3_28:4	0.0241563
		TG 50:0;2O|TG 15:0_16:0_19:0;2O	0.037152			TG 56:8|TG 18:0_18:3_20:5	0.0291587
		TG 50:1;2O|TG 16:0_17:1_17:0;2O	0.0450493			TG 56:8|TG 20:2_18:3_18:3	0.0192892
		TG 50:1|TG 16:0_16:0_18:1	2.35075			TG 56:9|TG 18:1_18:3_20:5	0.00447129
		TG 50:2|TG 16:0_16:1_18:1	5.27702			TG 57:11|TG 16:2_21:4_20:5	0.00781103
		TG 50:3;3O|TG 16:1_18:1_16:1;3O	0.00751225			TG 57:4|TG 21:0_18:2_18:2	0.00384974
		TG 50:3|TG 16:1_16:1_18:1	2.43869			TG 58:1|TG 16:0_24:0_18:1	0.0162108
		TG 50:4|TG 16:0_18:1_16:3	0.212108			TG 58:1|TG 16:0_24:0_18:1	0.0211479
		TG 50:4|TG 16:1_18:1_16:2	0.405431			TG 58:2|TG 16:0_18:1_24:1	0.656457
		TG 50:5|TG 14:0_16:0_20:5	0.538281			TG 58:3|TG 18:1_18:1_22:1	0.0480219
		TG 50:6|TG 14:0_16:1_20:5	0.312681			TG 58:3|TG 18:1_18:1_22:1	1.91877
		TG 50:6|TG 14:0_16:1_20:5	0.0215728			TG 58:5;1O|TG 18:2_18:2_22:1;1O	0.00326473
		TG 50:6|TG 16:1_16:1_18:4	0.00627208			TG 58:5|TG 19:0_19:0_20:5	0.0165721
		TG 50:7|TG 14:0_16:2_20:5	0.10388			TG 58:5|TG 22:1_18:2_18:2	0.993948
		TG 50:8|TG 14:0_16:3_20:5	0.0417886			TG 58:6|TG 22:1_18:2_18:3	1.43447
		TG 50:8|TG 14:0_18:4_18:4	0.0068708			TG 58:7;1O|TG 18:2_18:3_22:2;1O	0.012262
		TG 50:9;3O|TG 16:4_18:4_16:1;3O	0.000611725			TG 58:7|TG 22:1_18:3_18:3	0.0208453
		TG 50:9|TG 14:0_16:4_20:5	0.0583918			TG 59:2|TG 23:0_18:1_18:1	0.000904382
		TG 51:1|TG 16:0_17:0_18:1	0.0551749			TG 59:2|TG 23:0_18:1_18:1	0.00459326
		TG 51:2|TG 16:0_17:1_18:1	1.50012			TG 59:3|TG 23:0_18:1_18:2	0.0144501
		TG 51:3|TG 16:1_17:1_18:1	0.350563			TG 59:3|TG 23:0_18:1_18:2	0.010468
		TG 51:4|TG 16:1_18:1_17:2	0.0519372			TG 59:4|TG 23:0_18:2_18:2	0.0389295
		TG 51:5|TG 15:0_16:0_20:5	0.0569744			TG 60:2|TG 18:0_18:1_24:1	0.07649
		TG 51:5|TG 15:0_18:1_18:4	0.101672			TG 60:2|TG 18:0_18:1_24:1	0.095161
		TG 51:6|TG 14:0_15:0_22:6	0.0691171			TG 60:2|TG 24:0_18:1_18:1	0.0243434
		TG 51:6|TG 16:1_17:1_18:4	0.0190593			TG 60:3|TG 18:1_18:1_24:1	0.282149
		TG 52:1;2O|TG 15:0_18:1_19:0;2O	0.0824826			TG 60:3|TG 18:1_18:1_24:1	0.0760828
		TG 52:1;2O|TG 16:0_17:1_19:0;2O	0.0963303			TG 60:3|TG 18:1_18:1_24:1	0.0236752
		TG 52:1|TG 16:0_18:0_18:1	0.496936			TG 60:3|TG 18:1_18:1_24:1	0.437614
		TG 52:10|TG 16:1_16:4_20:5	0.0102939			TG 60:3|TG 18:1_18:1_24:1	0.0271819
		TG 52:10|TG 16:1_16:4_20:5	0.027205			TG 60:4|TG 18:1_24:1_18:2	0.481935
		TG 52:10|TG 16:1_16:4_20:5	0.0452195			TG 60:4|TG 18:1_24:1_18:2	0.856707
		TG 52:11|TG 16:2_16:4_20:5	0.0137235			TG 60:5|TG 24:1_18:2_18:2	0.650274
		TG 52:12|TG 16:3_16:4_20:5	0.00405992			TG 60:5|TG 24:1_18:2_18:2	0.00840969
		TG 52:2;2O|TG 16:0_17:1_19:1;2O	0.181147			TG 60:5|TG 24:1_18:2_18:2	0.0426498
		TG 52:2|TG 16:0_18:1_18:1	7.99924			TG 60:6|TG 24:1_18:2_18:3	1.24917
		TG 52:3;2O|TG 16:1_17:1_19:1;2O	0.36157			TG 60:7|TG 24:1_18:3_18:3	0.0238905
		TG 52:3|TG 16:1_18:1_18:1	5.18261			TG 60:7|TG 24:1_18:3_18:3	0.0290874
		TG 52:4|TG 16:1_18:1_18:2	1.42832			TG 61:5;1O|TG 22:1_22:1_17:3;1O	0.0203713
		TG 52:5|TG 16:0_18:1_18:4	0.188458			TG 62:2|TG 24:0_18:1_20:1	0.00122378
		TG 52:6|TG 14:0_16:0_22:6	1.03828			TG 62:3|TG 18:1_20:1_24:1	0.00314641
		TG 52:6|TG 16:1_18:1_18:4	0.598117			TG 62:4|TG 20:1_24:1_18:2	0.15113
		TG 52:6|TG 16:1_18:1_18:4	0.777067			TG 62:5|TG 20:1_24:1_18:3	0.0697916
		TG 52:7|TG 16:1_16:1_20:5	0.00796826			TG 62:5|TG 20:1_24:1_18:3	0.00473627
		TG 52:7|TG 16:1_16:1_20:5	0.350037			TG 62:5|TG 20:1_24:1_18:3	0.0668311
		TG 52:8|TG 16:0_16:3_20:5	0.111798			TG 62:6|TG 26:1_18:2_18:3	0.0231207
		TG 52:8|TG 16:2_18:3_18:3	0.0047591			TG 62:6|TG 26:1_18:2_18:3	0.0301942
		TG 52:9|TG 16:0_16:4_20:5	0.192296			TG 64:5|TG 22:1_24:1_18:3	0.00185881
		TG 52:9|TG 16:0_16:4_20:5	0.0338094			TG 64:5|TG 22:1_24:1_18:3	0.00253552
		TG 53:1|TG 16:0_17:0_20:1	0.0511264
		TG 53:2|TG 16:0_17:1_20:1	0.604948
		TG 53:2|TG 16:0_17:1_20:1	0.439889
		TG 53:3|TG 17:1_18:1_18:1	1.17349
		TG 53:4|TG 17:1_18:1_18:2	0.152899
		TG 53:4|TG 18:1_18:1_17:2	0.0411141
		TG 53:6|TG 15:0_18:1_20:5	0.174334
		TG 53:7|TG 16:1_17:1_20:5	0.0731123
		TG 53:7|TG 16:1_17:1_20:5	0.0929995
		TG 53:8|TG 16:1_17:2_20:5	0.016082
		TG 53:9|TG 15:0_18:4_20:5	0.00286762
		TG 54:1;2O|TG 17:0_18:1_19:0;2O	0.242255
		TG 54:1|TG 16:0_18:0_20:1	0.117763
		TG 54:10|TG 14:0_18:4_22:6	0.313827
		TG 54:11|TG 16:1_16:4_22:6	0.0166292
		TG 54:12|TG 16:3_18:4_20:5	0.00357526
		TG 54:12|TG 16:3_18:4_20:5	0.0090687
		TG 54:13|TG 16:4_18:4_20:5	0.00712968
		TG 54:2;2O|TG 15:0_20:1_19:1;2O	0.0985639
		TG 54:2|TG 16:0_18:1_20:1	2.01209
		TG 54:2|TG 16:0_18:1_20:1	2.86366
		TG 54:3|TG 18:1_18:1_18:1	6.1521
		TG 54:4|TG 18:1_18:1_18:2	0.730859
		TG 54:4|TG 18:1_18:1_18:2	1.00584
		TG 54:6|TG 16:0_18:1_20:5	1.82757
		TG 54:7|TG 16:1_18:1_20:5	2.34868
		TG 54:8|TG 16:1_16:1_22:6	0.615979
		TG 54:9|TG 16:0_18:4_20:5	0.331485
		TG 55:2;1O|TG 17:1_18:1_20:0;1O	0.250585
		TG 55:2|TG 16:0_17:1_22:1	0.123914
		TG 55:2|TG 17:0_18:1_20:1	0.20143
		TG 55:3;2O|TG 18:1_18:1_19:1;2O	0.0819158
		TG 55:3|TG 17:1_18:1_20:1	0.409026
		TG 55:4|TG 18:1_20:1_17:2	0.0286491
		TG 55:6|TG 16:0_18:1_21:5	0.0955147
		TG 55:7|TG 17:1_18:1_20:5	0.0707916
		TG 55:8|TG 16:1_17:1_22:6	0.0590107
		TG 55:8|TG 16:1_17:1_22:6	0.0250209
		TG 55:9;1O|TG 18:2_18:2_19:5;1O	0.00345819
		TG 55:9|TG 16:0_18:4_21:5	0.0196142
		TG 55:9|TG 16:1_17:2_22:6	0.0130765
		TG 56:1|TG 16:0_18:0_22:1	0.0841236
		TG 56:1|TG 16:0_18:0_22:1	0.111945
		TG 56:10|TG 16:0_18:4_22:6	0.684876
		TG 56:11|TG 14:0_20:5_22:6	0.19431
		TG 56:11|TG 16:1_18:4_22:6	0.151878
		TG 56:12|TG 16:2_20:5_20:5	0.0200684
		TG 56:13|TG 18:4_18:4_20:5	0.0192604
		TG 56:14|TG 16:4_20:5_20:5	0.0148548
		TG 56:14|TG 16:4_20:5_20:5	0.0181573
		TG 56:2|TG 16:0_18:1_22:1	1.5116
		TG 56:3;2O|TG 17:1_20:1_19:1;2O	0.161782
		TG 56:3|TG 18:1_18:1_20:1	3.91282
		TG 56:4|TG 18:1_20:1_18:2	0.408084
		TG 56:5|TG 16:0_18:1_22:4	0.0936534
		TG 56:6|TG 16:0_18:1_22:5	0.995078
		TG 56:7|TG 16:0_18:1_22:6	3.70104
		TG 56:7|TG 16:0_18:1_22:6	0.182897
		TG 56:8|TG 16:1_18:1_22:6	1.55977
		TG 56:8|TG 16:1_18:1_22:6	0.127374
		TG 56:9|TG 16:0_20:4_20:5	0.400931
		TG 57:10|TG 16:0_20:5_21:5	0.0153365
		TG 57:2|TG 17:0_18:1_22:1	0.151343
		TG 57:3|TG 17:1_18:1_22:1	0.138323
		TG 57:3|TG 17:1_18:1_22:1	0.100911
		TG 57:5;2O|TG 20:1_20:4_17:0;2O	0.0189831
		TG 57:7|TG 17:0_18:1_22:6	0.0946849
		TG 57:7|TG 17:0_18:1_22:6	0.0454954
		TG 57:8|TG 17:1_18:1_22:6	0.130482
		TG 57:9|TG 18:1_17:2_22:6	0.0221389
		TG 58:1;2O|TG 22:0_17:1_19:0;2O	0.0233002
		TG 58:1;2O|TG 22:0_17:1_19:0;2O	0.0278695
		TG 58:11|TG 16:0_20:5_22:6	0.483682
		TG 58:11|TG 16:0_20:5_22:6	0.361776
		TG 58:12|TG 16:1_20:5_22:6	0.0878581
		TG 58:13|TG 16:2_20:5_22:6	0.0100548
		TG 58:13|TG 18:4_20:4_20:5	0.0124135
		TG 58:14|TG 18:4_20:5_20:5	0.025212
		TG 58:15|TG 16:4_20:5_22:6	0.0136971
		TG 58:2|TG 16:0_20:1_22:1	1.3279
		TG 58:3|TG 18:1_18:1_22:1	2.20297
		TG 58:4|TG 18:1_22:1_18:2	0.195737
		TG 58:4|TG 18:1_22:1_18:2	0.192739
		TG 58:6|TG 16:0_22:1_20:5	0.114278
		TG 58:6|TG 18:0_18:1_22:5	0.0449883
		TG 58:7|TG 18:0_18:1_22:6	1.04719
		TG 58:8|TG 18:1_18:1_22:6	1.9839
		TG 58:9|TG 18:1_18:2_22:6	0.202553
		TG 59:1|TG 17:0_22:0_20:1	0.0149921
		TG 59:12|TG 16:1_21:5_22:6	0.0182196
		TG 59:2|TG 17:0_20:1_22:1	0.0470373
		TG 59:2|TG 17:0_20:1_22:1	0.0369207
		TG 59:2|TG 17:0_20:1_22:1	0.00908043
		TG 59:2|TG 17:0_20:1_22:1	0.011862
		TG 59:3|TG 17:1_20:1_22:1	0.418896
		TG 59:3|TG 17:1_20:1_22:1	0.33601
		TG 59:7;2O|TG 18:0_22:6_19:1;2O	0.0594808
		TG 59:8|TG 18:1_19:1_22:6	0.0183992
		TG 60:10|TG 18:1_20:4_22:5	0.0563198
		TG 60:11|TG 18:1_20:5_22:5	0.0650807
		TG 60:12|TG 18:1_20:5_22:6	0.484711
		TG 60:13|TG 16:1_22:6_22:6	0.0679324
		TG 60:13|TG 16:1_22:6_22:6	0.0616382
		TG 60:14|TG 18:3_20:5_22:6	0.0200885
		TG 60:15|TG 18:4_20:5_22:6	0.0643056
		TG 60:15|TG 20:5_20:5_20:5	0.00780443
		TG 60:2|TG 16:0_20:1_24:1	0.378303
		TG 60:3|TG 18:1_20:1_22:1	1.22157
		TG 60:3|TG 18:1_20:1_22:1	1.28088
		TG 60:7|TG 16:0_22:1_22:6	0.0574938
		TG 60:7|TG 16:0_22:1_22:6	0.104439
		TG 60:8|TG 18:1_20:1_22:6	0.445015
		TG 60:9|TG 18:1_20:2_22:6	0.0674551
		TG 61:12|TG 18:1_21:5_22:6	0.0230209
		TG 61:3|TG 19:1_20:1_22:1	0.0503292
		TG 62:12|TG 20:1_20:5_22:6	0.0468817
		TG 62:13|TG 18:1_22:6_22:6	0.307541
		TG 62:15|TG 20:4_20:5_22:6	0.019453
		TG 62:16|TG 20:5_20:5_22:6	0.00863011
		TG 62:16|TG 20:5_20:5_22:6	0.07994
		TG 62:2;O2|TG 17:0_18:1_12:0;O(FA 15:0)	0.00642186
		TG 62:2|TG 16:0_22:1_24:1	0.0843926
		TG 62:3|TG 18:1_22:1_22:1	0.0158186
		TG 62:4|TG 18:1_22:1_22:2	0.0511412
		TG 62:8|TG 18:1_22:1_22:6	0.327657
		TG 63:3|TG 17:1_22:1_24:1	0.0186973
		TG 64:13|TG 20:1_22:6_22:6	0.0333245
		TG 64:17|TG 20:5_22:6_22:6	0.0193296
		TG 64:8|TG 20:1_22:1_22:6	0.0527918
		TG 65:3|TG 20:1_22:1_23:1	0.00424907
		TG 65:9;1O|TG 22:1_22:6_21:2;1O	0.00269036
		∑	100				100
		n	335				204
